# Supplementary material for: Direct determination of free metal concentration by implementing stripping chronopotentiometry as the second stage of AGNES
Source: Royal Society of Chemistry journal article supplement (doi:10.1039/c1an15481h), 2011-01-01
Supplement: c1an15481h.pdf [file c1an15481h.pdf]

# **Direct determination of free metal concentration by implementing stripping chronopotentiometry as second stage of AGNES**

C. Parat <sup>a\*</sup>, L. Authier <sup>a</sup>, D. Aguilar <sup>b</sup>, E. Companys <sup>b</sup>, J. Puy <sup>b</sup>, J. Galceran <sup>b</sup> and M. Potin-Gautier <sup>a</sup>

<sup>a</sup>*IPREM, UMR 5254, L.C.A.B.I.E., Avenue Pierre Angot, 64053 Pau Cedex 9, France*

<sup>b</sup>*Departament de Química. Universitat de Lleida, Rovira Roure 191, 25198 Lleida, Spain*

\*Corresponding author. E-mail: corinne.parat@univ-pau.fr; fax: +33 559 40 76 74

## **Supporting data**

### Determination of the faradaic charge: implementation of $I_{Ox}$ and $\tau'$

We are specifically interested in an accurate computation of the faradaic charge because its physicochemical nature will allow a better understanding of the processes. Furthermore, when using the faradaic charge in

$$Q = nFV_{Hg} [M^0] = \eta_Q Y [M^{n+}] = h_Q [M^{n+}] \quad (S1)$$

we will retrieve  $h_Q$  and  $\eta_Q$  values which can be compared and tested against literature values.

Due to the interest in the charge associated to the accumulated  $M^0$ , we apply SCP under conditions of total depletion.

The imposed stripping current can be splitted into several components: the faradaic current ( $I_{faradaic}$ , the one relevant for AGNES purposes), the capacitive current ( $I_{cap}$ ) and the current due to other oxidants ( $I_{Ox}$ ) [1]:

$$I_s = I_{faradaic} + I_{Ox} + I_{cap} = I_{faradaic} + I_{Ox} + C \frac{dE}{dt} \quad (S2)$$

Indeed, the electrons provided to the galvanostat can come from the reoxidation of  $M^0$  (which is also helped by the reduction of other species such as traces of oxygen or other interfering cations, also called electroless effect [2]) or from the charging process of the electrode acting as a capacitor. The capacitance  $C$  can be computed by considering a (virtual) blank experiment where no analyte is present. From Eq. (S2), with  $I_{faradaic}=0$ :

$$C = (I_s - I_{Ox}) \left( \frac{dt}{dE} \right)_{blank} \quad (S3)$$

As we are interested in the faradaic charge,

$$Q = \int I_{faradaic} dt = \int \left( I_s - I_{Ox} - C \frac{dE}{dt} \right) dt = \int (I_s - I_{Ox}) \frac{dt}{dE} dE - \int (I_s - I_{Ox}) \left( \frac{dt}{dE} \right)_{blank} dE \quad (S4)$$

In AGNES-SCP practice, the initial potential  $E_0$  will correspond to the deposition potential associated to the desired gain  $Y$ . If we assume that the oxidant current is practically constant

in the range between  $E_0$  and  $E_f$  (the initial and final potential estimated for the reoxidation process):

$$Q = (I_s - I_{Ox}) \int_{E_0}^{E_f} \left[ \left( \frac{dt}{dE} \right) - \left( \frac{dt}{dE} \right)_{blank} \right] dE \quad (S5)$$

Traditionally, a similar integral has been measured from the *area above the baseline* and, thus, automatically discounting the electrode capacitive current:

$$\tau = \int_{E_0}^{E_f} \left( \frac{dE}{dt} - \left[ \frac{dE}{dt} \right]_{baseline} \right) dt \quad (S6)$$

which results from just identifying the baseline with the blank.

However, we have found some special situations in which computing  $\tau$  can represent a challenge to this direct method. One of these situations is shown in Figure 4, where a distorted stripping  $dt/dE$  peak appears while performing a speciation study with  $Cd^{2+}$  and oxalate in presence of  $Pb^{2+}$  as interference. Due to the initial  $dt/dE$  value (around 380 s/V) quite above with respect the usual baseline, it is not possible to apply previous Eq. (i.e. to read the area above the baseline directly).

We can split Eq. (S5) into two components:

$$Q = (I_s - I_{Ox}) \int_{E_0}^{E_f} \left( \frac{dt}{dE} \right) dE - (I_s - I_{Ox}) \int_{E_0}^{E_f} \left( \frac{dt}{dE} \right)_{blank} dE = (I_s - I_{Ox}) \left[ \tau' - \int_{E_0}^{E_f} \left( \frac{dt}{dE} \right)_{blank} dE \right] \quad (S7)$$

where we call  $\tau'$  to the integral:

$$\tau' = \int_{E_0}^{E_f} \left( \frac{dt}{dE} \right) dE \quad (S8)$$

which corresponds to the *total* area under the peak in the  $dt/dE$  versus  $E$  plots (see shaded region in Figure 4), i.e. from the abscissa axis up to the curve.

We need further assumptions to compute  $\int_{E_0}^{E_f} \left( \frac{dt}{dE} \right)_{blank} dE$ . In the experiments found in this work, the baseline after the peak was practically horizontal. Thus, if we identify the baseline  $dt/dE$  with the blank  $dt/dE$  and assume its constancy also for the region  $E_0$  to  $E_f$ :

$$Q = (I_s - I_{Ox}) \left[ \tau' - \left( \frac{dt}{dE} \right)_{baseline} (E_f - E_0) \right] = (I_s - I_{Ox}) \tau \quad (S9)$$

So, when necessary in this work, the following determination of  $\tau$  has been applied:

$$\tau = \tau' - \left[ \frac{dt}{dE} \right]_{baseline} (E_f - E_0) \quad (S10)$$

For example, in Figure 4, we read  $\left[ \frac{dt}{dE} \right]_{baseline} = 30$  s/V at  $E_f = -0.56$  V. Notice that the shaded area below the dashed line corresponds to capacitive component given by the product

$\left[ \frac{dt}{dE} \right]_{baseline} (E_f - E_0)$ , while the area above the dashed line corresponds to  $\tau$ .

Of course, more elaborate models for the variation of the baseline for the region  $E_0$  to  $E_f$  can be derived to deal with other curves  $dt/dE$ .

In summary, taking into account all the current contributions, the stripped faradaic charge during an AGNES experiment with SCP as the second stage can be calculated with:

$$Q = (I_s - I_{Ox}) \tau \quad (S11)$$

$\tau$  can be either measured directly above the baseline, eqn. (S6), or, in some special situations like the one shown in Figure 4, from Eq. (S10).

Similar oxidants corrections have been suggested previously [1, 3]

## References

- [1] A. J. Bard, L. R. Faulkner, *Electrochemical Methods: Fundamentals and Applications* John Wiley & Sons, 2001.
- [2] R. M. Town, H. P. van Leeuwen, *Journal of Electroanalytical Chemistry* 573 (2004) 147-157.
- [3] C. Hua, D. Jagner, L. Renman, *Analytica Chimica Acta* 197 (1987) 257-264.

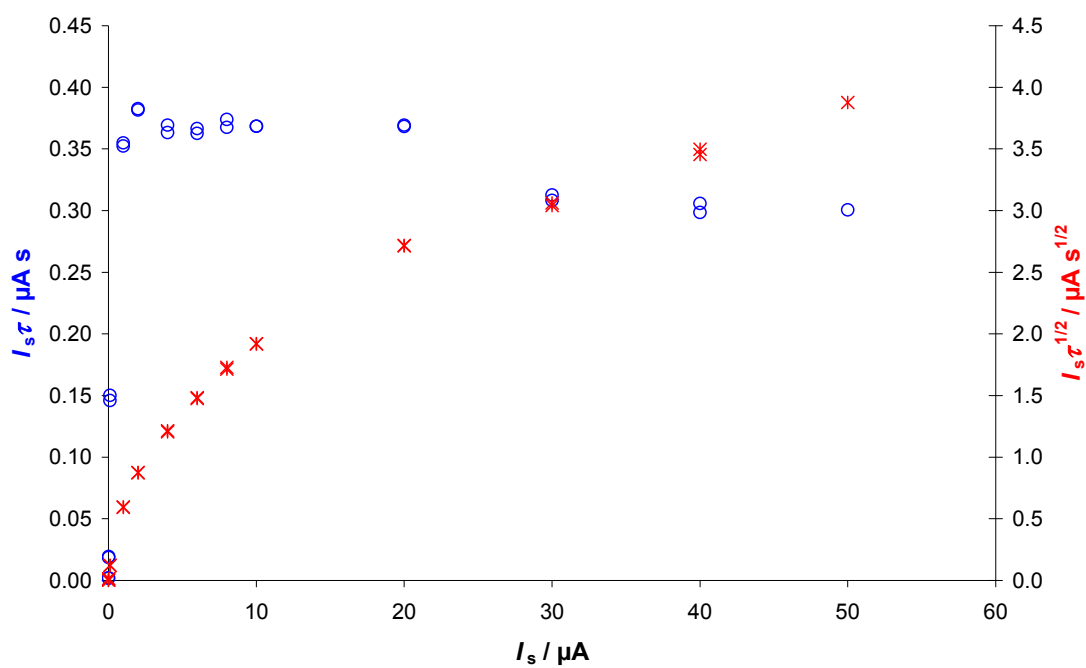

**Figure S1.** Behaviour of  $I\tau$  (○) and  $I\tau^{1/2}$  (\*) obtained with a SPE.  $c_{\text{T,Zn}} = 100 \text{ nmol L}^{-1}$ ,  $[\text{KNO}_3] = 0.1 \text{ mol L}^{-1}$ ,  $Y = 5000$  and  $t_1 = 400 \text{ s}$ .  $I_s$  from  $10^{-10}$  to  $5 \times 10^{-5} \text{ A}$ .

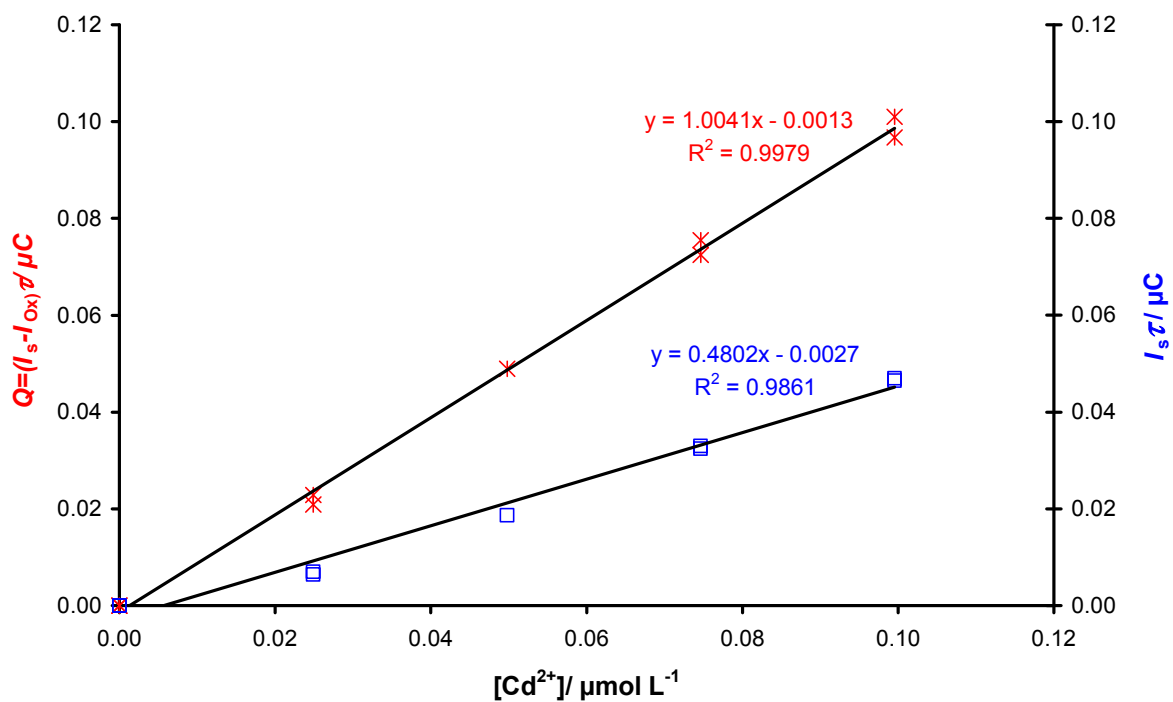

**Figure S2.** Cd<sup>2+</sup> calibration in AGNES-SCP with a HMDE including the oxidants correction (\*, referred to the left hand side ordinate axis, computed with Eq. (S11) or without the oxidants correction (□, referred to the right hand side ordinate axis, computed as  $I_s \tau$ ).  $Y = 500$ ,  $t_{1,a} = 350$  s,  $t_{1,b} = 1050$  s,  $I_s = 1$  nA,  $[\text{KNO}_3] = 0.1$  mol L<sup>-1</sup>.

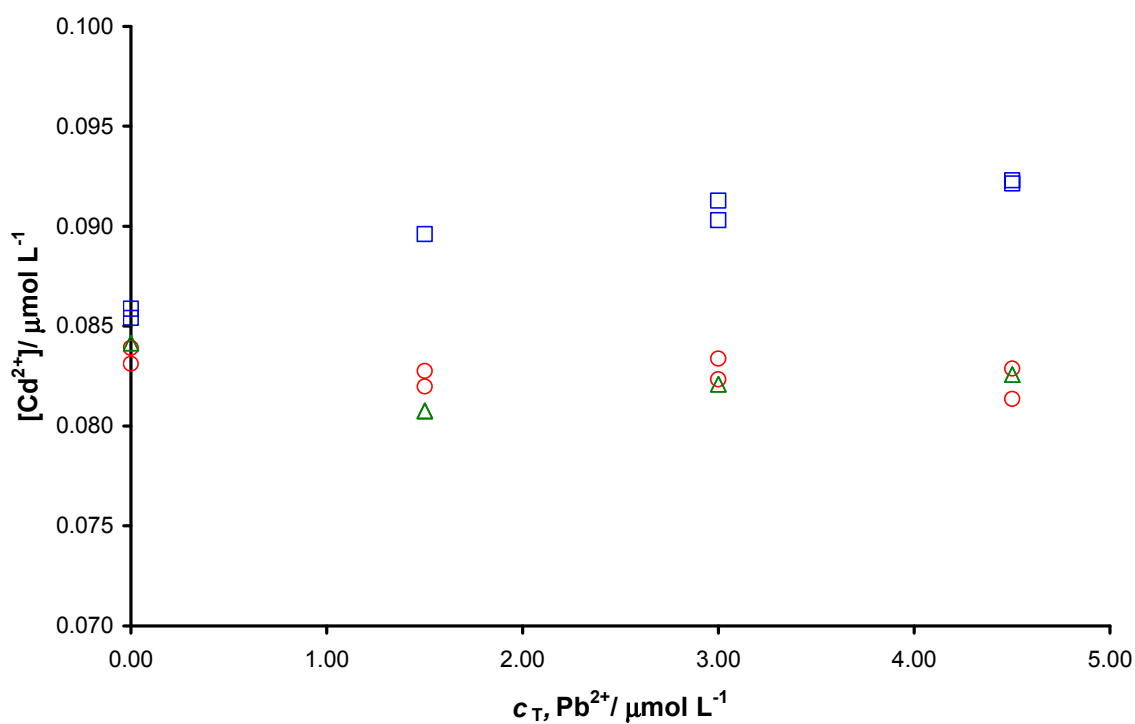

**Figure S3.** Free Cd concentration at different Pb additions ( $1 - 4.5 \times 10 \mu\text{mol L}^{-1}$ ) when a total Cd concentration of  $3 \mu\text{mol L}^{-1}$  is complexed with oxalate  $0.02 \text{ mol L}^{-1}$  as determined by AGNES ( $\square$  stands for AGNES performed with  $Y = 500$ ,  $t_1 = 300 \text{ s}$  and a fixed potential in the stripping stage,  $\circ$  stands for AGNES-SCP with  $Y = 500$ ,  $t_1 = 300 \text{ s}$ ,  $I_s = 1 \text{ nA}$ ) and ISE ( $\Delta$ ).
